# Supplementary material
Source: ML conference proceedings conference paper supplement (https://aclanthology.org/2021.emnlp-main.675)
Supplement: Software [file IndoAryanLM_EMNLP.pdf › IndoAryanLM_EMNLP.pdf]

## A Other tasks

| LG                                                                | IndicBert     | mBERT         | XLM-R         | MuRIL         | IA-TR         | IA-O          |
|-------------------------------------------------------------------|---------------|---------------|---------------|---------------|---------------|---------------|
| <b>Article-Genre Classification / bbc-articles (Accuracy)</b>     |               |               |               |               |               |               |
| hi                                                                | 0.7460        | 0.6055        | <b>0.7552</b> | 0.7367        | 0.7206        | 0.6963        |
| <b>Article-Genre Classification / inltk-headline (Accuracy)</b>   |               |               |               |               |               |               |
| gu                                                                | <b>0.9291</b> | 0.8916        | 0.8983        | 0.9226        | 0.8330        | 0.9044        |
| mr                                                                | 0.9430        | 0.8750        | 0.9248        | <b>0.9545</b> | 0.9355        | 0.9248        |
| <b>Article-Genre Classification / Soham-article (Accuracy)</b>    |               |               |               |               |               |               |
| bn                                                                | 0.7845        | 0.8023        | 0.8760        | <b>0.9340</b> | 0.5988        | 0.8029        |
| <b>Textual Entailment / copa-translated (Accuracy)</b>            |               |               |               |               |               |               |
| hi                                                                | 0.6250        | <b>0.6590</b> | 0.4318        | 0.5568        | <b>0.6591</b> | 0.5796        |
| gu                                                                | 0.5341        | 0.4318        | 0.4886        | <b>0.5909</b> | <b>0.5909</b> | 0.5113        |
| mr                                                                | 0.5909        | 0.5568        | 0.6136        | 0.5682        | 0.5909        | <b>0.6590</b> |
| <b>Textual Entailment / wnli-translated (F-Score)</b>             |               |               |               |               |               |               |
| hi                                                                | 0.3604        | 0.3604        | 0.3604        | 0.3604        | 0.3604        | 0.3616        |
| gu                                                                | 0.3604        | 0.3604        | <b>0.5389</b> | 0.3604        | 0.3107        | 0.3604        |
| mr                                                                | 0.3604        | 0.4167        | <b>0.4496</b> | 0.3914        | 0.4228        | 0.3604        |
| <b>Sentiment Analysis / iitp-movie-reviews (Accuracy)</b>         |               |               |               |               |               |               |
| hi                                                                | 0.5903        | 0.5677        | 0.6161        | <b>0.7032</b> | 0.6000        | 0.5967        |
| <b>Sentiment Analysis / iitp-product-reviews (Accuracy)</b>       |               |               |               |               |               |               |
| hi                                                                | 0.7132        | 0.7457        | 0.7897        | <b>0.8183</b> | 0.7705        | 0.7457        |
| <b>Discourse Mode Classification / midas-discourse (Accuracy)</b> |               |               |               |               |               |               |
| hi                                                                | 0.7844        | 0.7120        | 0.7994        | <b>0.8164</b> | 0.7994        | 0.7943        |
| <b>Entity Classification / wikiann-ner (F-Score)</b>              |               |               |               |               |               |               |
| hi                                                                | 0.9031        | 0.8656        | 0.8962        | <b>0.9237</b> | 0.8720        | 0.8476        |
| bn                                                                | 0.9339        | 0.9181        | 0.9295        | <b>0.9503</b> | 0.9211        | 0.9486        |
| gu                                                                | 0.7021        | 0.6804        | 0.5532        | 0.8016        | 0.7306        | <b>0.8318</b> |
| mr                                                                | 0.8871        | 0.9127        | 0.8786        | <b>0.9199</b> | 0.8675        | 0.8482        |
| or                                                                | 0.3509        | 0.1905        | 0.2500        | 0.3882        | 0.3460        | <b>0.5737</b> |
| pa                                                                | 0.4444        | 0.5000        | 0.1786        | 0.8535        | 0.3491        | <b>0.6313</b> |
| <b>Title Prediction / wiki-section-title (Accuracy)</b>           |               |               |               |               |               |               |
| hi                                                                | 0.7780        | 0.8012        | 0.7692        | <b>0.8528</b> | 0.6779        | 0.6761        |
| bn                                                                | 0.8266        | 0.8253        | 0.8091        | <b>0.8781</b> | 0.6135        | 0.7062        |
| gu                                                                | 0.6879        | 0.7452        | 0.2739        | <b>0.8465</b> | 0.2614        | 0.4044        |
| mr                                                                | 0.7744        | 0.8049        | 0.7744        | <b>0.8529</b> | 0.5299        | 0.5031        |
| or                                                                | 0.6825        | 0.2222        | 0.6825        | <b>0.8167</b> | 0.2928        | 0.3147        |
| pa                                                                | 0.7754        | 0.7247        | 0.7029        | <b>0.8240</b> | 0.2817        | 0.6235        |
| <b>Part-of-Speech Tagging / ud-pos (F-Score)</b>                  |               |               |               |               |               |               |
| hi                                                                | 0.9755        | 0.9693        | 0.9794        | <b>0.9779</b> | 0.9618        | 0.9562        |
| mr                                                                | 0.8024        | <b>0.9024</b> | 0.8249        | 0.5388        | 0.8114        | 0.7906        |
| ur                                                                | 0.9047        | 0.9102        | <b>0.9280</b> | 0.9168        | 0.9026        | 0.8915        |

Table 1: Comparison of Indo-Aryan LM with existing multilingual LMs.

Here, the results are reported on eleven datasets spread across seven tasks. Notice that monolingual datasets namely bbc-articles, soham-articles, iitp-movie-reviews, iitp-product-reviews, and midas-discourse are added in Table 1 in addition to the four tasks reported in main manuscript. In total, 28 task-language combinations are considered. Although, inltk-headline dataset is multilingual, the prediction classes are different in both (Gujarati and Marathi) parts which is unsuitable for multilingual FT.

On 16 out of 28 experiments, MuRIL obtains the best results. Note that, pre-training of MuRIL enjoys an additional supervision using the parallel corpora of transliterated (romanized) and translated

counterparts of original text. On 6 of the 28 experiments, either IA-TR or IA-O model improves over or equates to the state-of-the-art. This includes, 3-3 experiments pertaining to copa-translated and wikiann-ner each. Especially for the wikiann-ner, the improvement is significant for Gujarati (0.8318 vs 0.8016) and Oriya (0.5737 vs 0.3882).

Our fine-tuned models seems to be falling short on other tasks compared to the published results. Title Prediction task, in particular, seem to be the most difficult for the IA models.

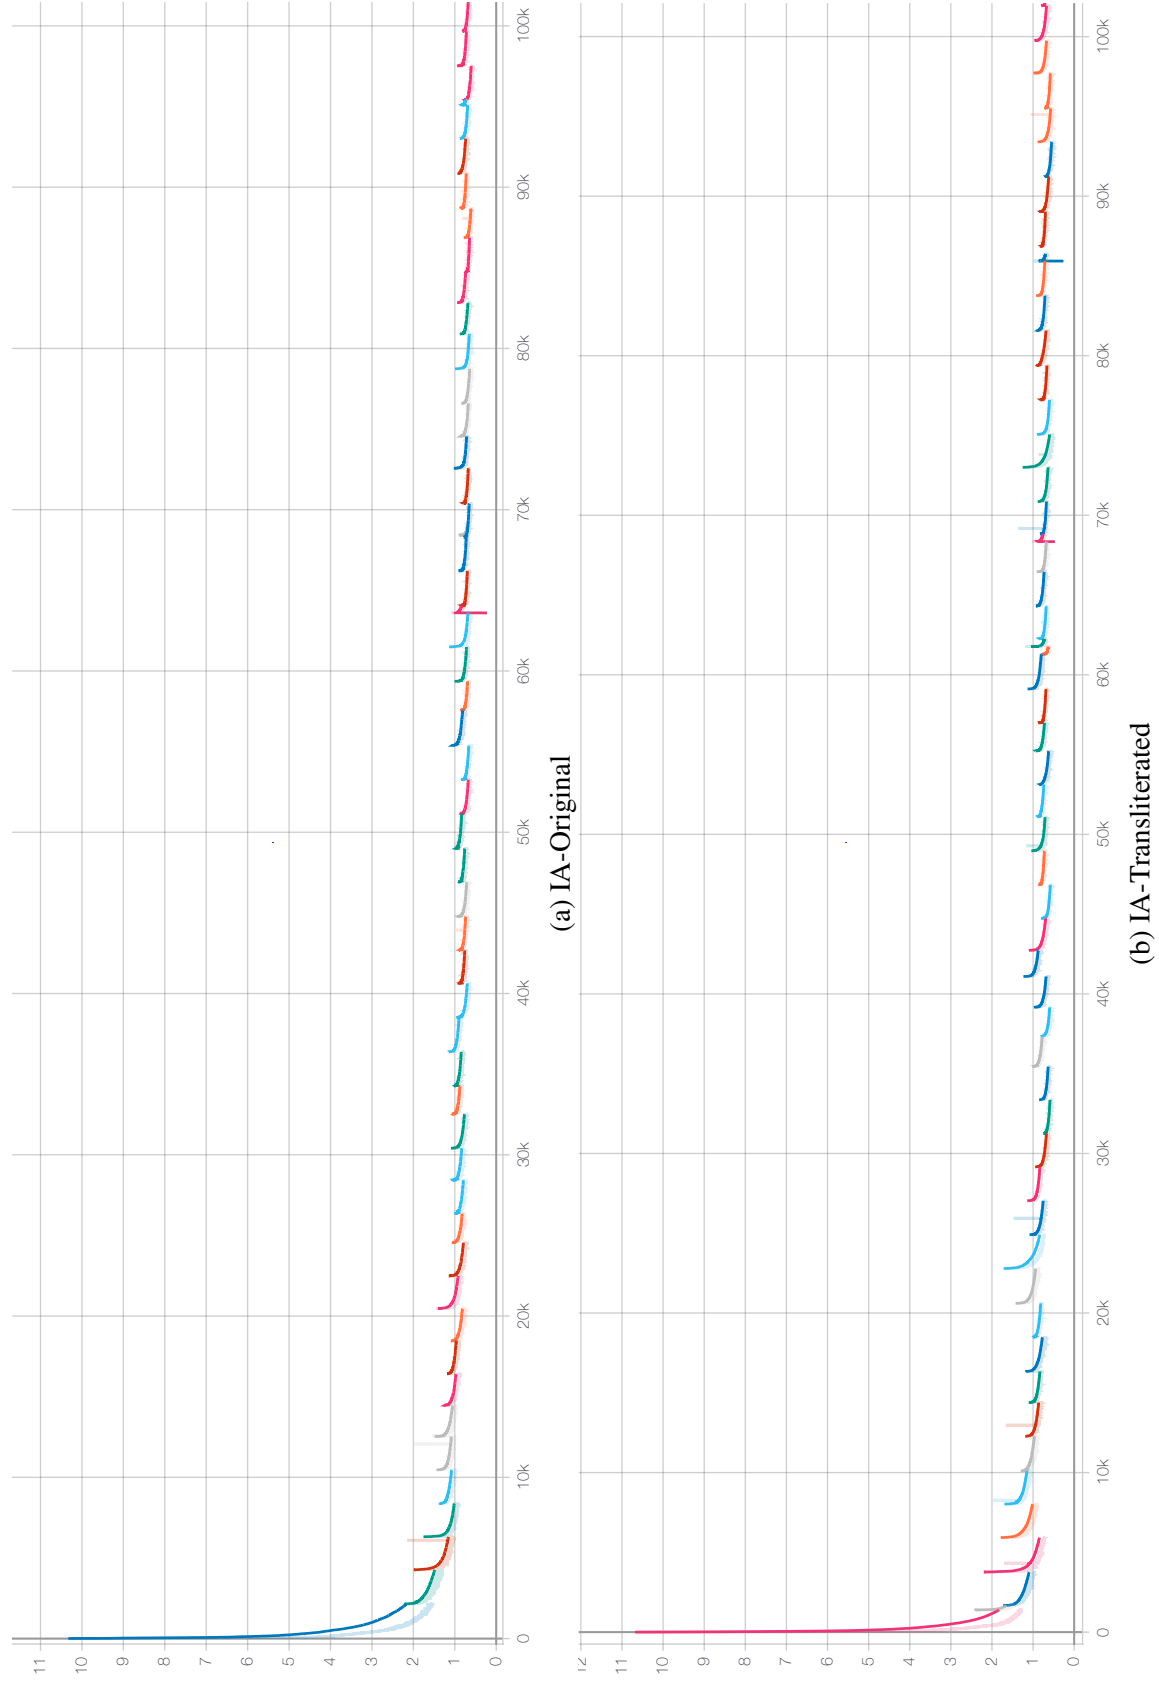

Figure 1: Loss graph pertaining to pre-training of language models. Steps and MLM loss are plotted on horizontal and vertical axes, respectively.
